# Supplementary material for: Developing Spring Wheat in the Noah-MP LSM (v4.4) for Growing Season Dynamics and Responses to Temperature Stress
Source: Copernicus journal article supplement (doi:10.5194/gmd-2022-311), 2023-01-26
Supplement: Supplementary file [file gmd-2022-311-AC1-supplement.pdf]

## Response to Referee (#1)

Ms. Ref. No: GMD-2022-311

Title: Developing Spring Wheat in the Noah-MP LSM (v4.4) for Growing Season Dynamics and Responses to Temperature Stress

<https://doi.org/10.5194/gmd-2022-311>

We really appreciate the comments and questions posted by two reviewers during the open discussion. These comments and questions are very constructive and positive, which substantially help improve the manuscript. Please see our responses to two reviewers in blue texts presented in this document.

1. In section 2.3, it is important to note that the Y-axis in figure 2b represents  $V(T)$  and not  $f(T)$ , and the equation for the blue line is Wang 2017, not Wang-Engel (1998). Additionally, the plots in figure 2 should be labeled as a and b, and the Y-axis labels should match the text. Furthermore, the manuscript's novelty is the new heat stress function, but it is not adequately explained. Therefore, it is essential to provide a detailed scientific explanation of the function to help readers better understand it.

We thank the reviewer for the advice on Figure 2 and highlights on our manuscript. We modified the Figure 2 with label (a) and (b) with title noting they are different responses for temperature and  $V_{cmax}$  function.

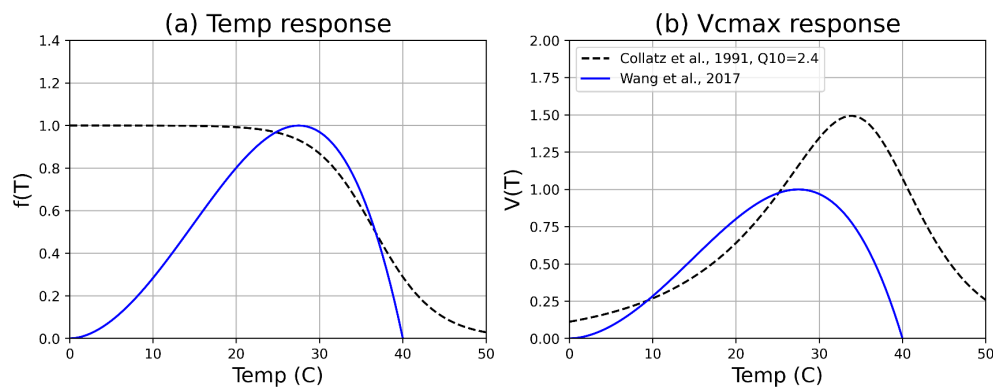

Figure 2 modified with label (a) & (b), and subtitles highlighting the responses for the temperature function and  $V_{cmax}$  (rubisco capacity) (also changed in the manuscript).

- In Figure 3, it is recommended to include subplot numbers (a, b, c) to avoid confusion.  
Thanks for the recommendation, subplot labels are added to Figure 3 in the revised version.

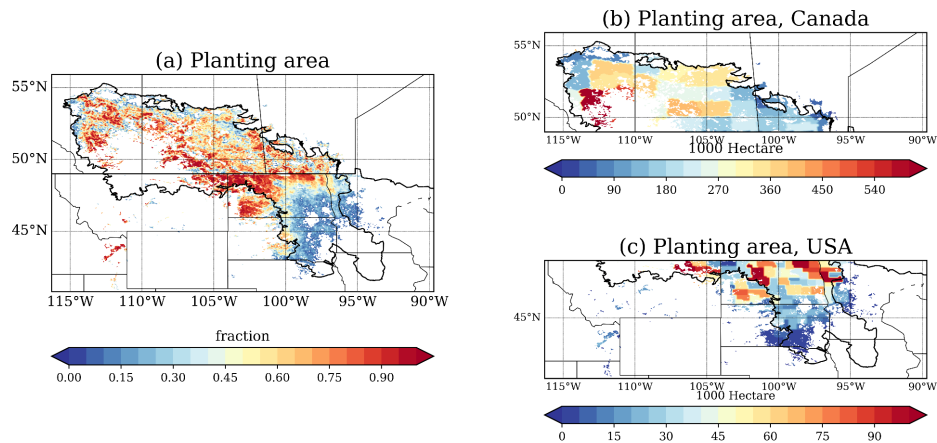

Adding subplot (a,b,c) for figure 3.

- In line 190, it should be noted that "O" should not be capitalized in the MODIS abbreviation.  
Thanks for the suggestion, we corrected this in the manuscript.
- In line 206, the CONUS abbreviation's full form is incorrect; it should be "Conterminous" instead of "CONTiguous."  
Thank you for the suggestion. Actually, both "conterminous" and "contiguous" are used in previous studies. For example, in Liu et al., (2016) at Climate Dynamics, the dataset was named as "contiguous United States" (CONUS). That's why we keep this name in the manuscript.
- In line 219, it is necessary to clarify that there is no equation 7 in the manuscript and refer the readers to the comments in section 2.3.  
Thanks for the reminder of equation 7. Indeed, it is critical and should be added to the manuscript.
- In line 230, the sentence is ambiguous, and it is unclear what the author means. According to the given numbers, the model seems to have overestimated the yields. Therefore, it is recommended to rephrase the sentence to make it clear that the model overestimated the yields.  
Thanks for the suggestion. We will rephrase the sentence: The model provides higher biomass estimate compared to the site recorded yield in 2019 (model: 405 g/m<sup>2</sup> and 247 g/m<sup>2</sup>; site: 2908 kg/ha = 290.8 g/m<sup>2</sup>, and 1635 kg/ha = 163.5 g/m<sup>2</sup>).

7. In section 3.1, it is essential to specify whether any other parameter tweaking was done during the single-point calibration and validation, besides GDD and Tavg for planting.

This is an important suggestion and we appreciate it. The growth stage GDD parameters were adopted from a reference paper by Saiyed et al. (2008) showing the reference GDD for five sites across the Canadian Prairies.

The growth stage carbon allocation parameters were adopted from the WOFOST model, for spring wheat: ([https://github.com/ajwdewit/WOFOST\\_crop\\_parameters/blob/master/wheat.yaml](https://github.com/ajwdewit/WOFOST_crop_parameters/blob/master/wheat.yaml)). We will add this information in the manuscript.

8. In Figure 6, the plot is overcrowded, and the colorbar is too small. To improve visibility, it is suggested to stack the three separate plots vertically and include a bigger horizontal colorbar. Furthermore, the description of Figure 6 needs improvement.

Thanks for the suggestion, we changed the colormap according to the MODIS LAI image from NASA (from brown to green) and stacked the figure vertically. This helps better arrange the page.

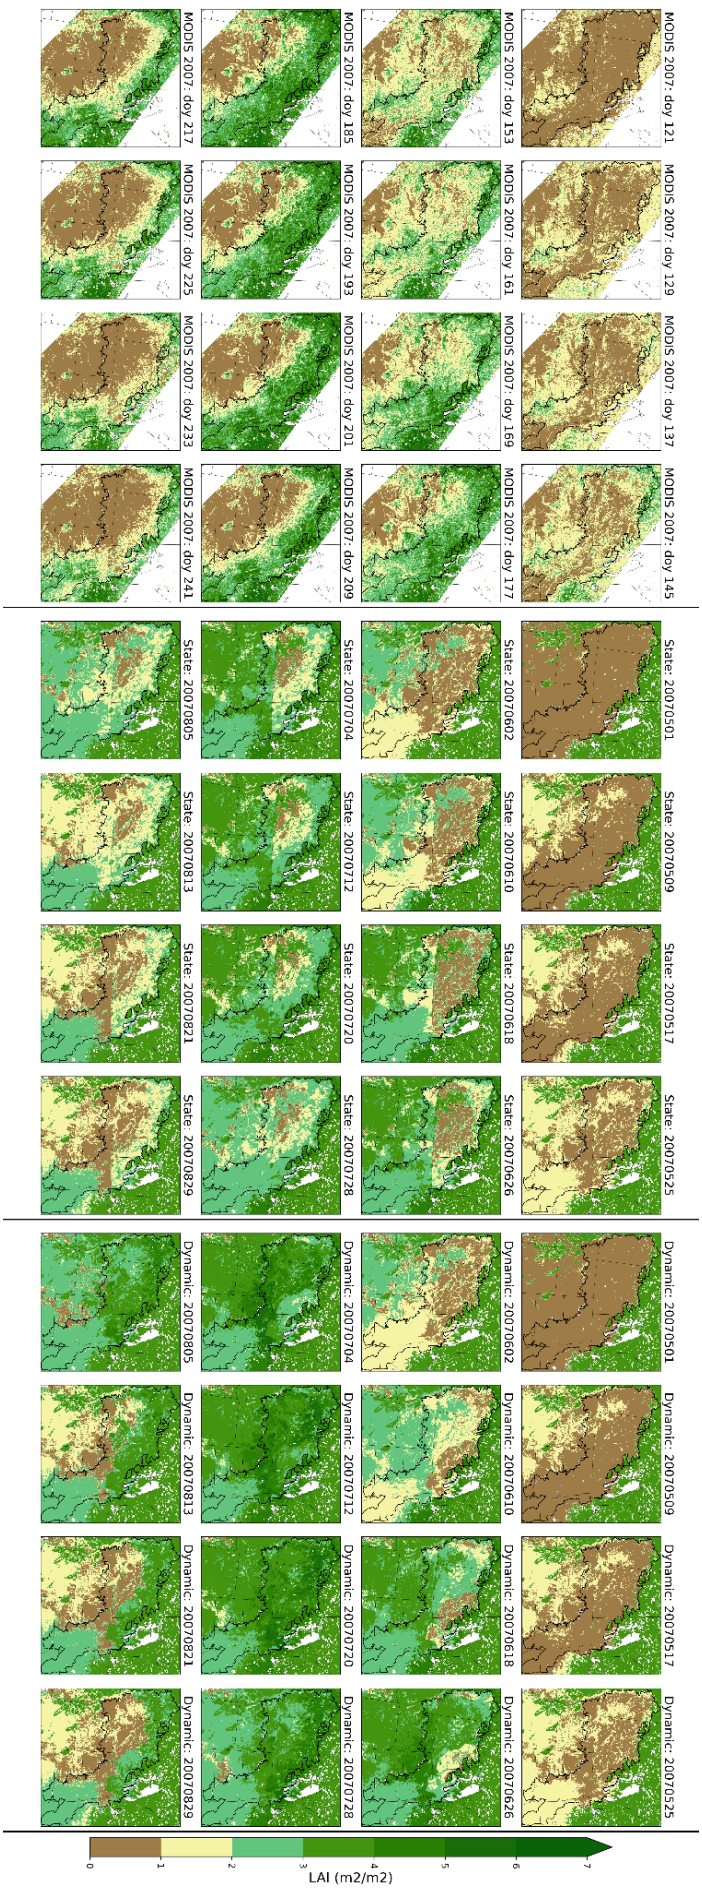

- In Figure 9, it would be clearer to separately plot the default and temperature stress results. The figure will now have three rows. Also, due to the marker type, it is challenging to see the improvement during the temperature stress function.

We appreciate this comment and suggestion. To better demonstrate the temperature stress treatment, we add linear regression slopes in figure 9 for better visualization, for both observation and model results. The modified figure 9 is provided below with subplot labels.

The model results show obvious negative impacts of hot days on crop yield, but not as much in the observations, except in Saskatchewan. This implies that other factors, in addition to temperature, are playing a role. For example, irrigation is contributing to additional water sources in Alberta and wet springs requiring tile drainage in Manitoba. Applying the new temperature stress function reduces crop yield under high hot day numbers. This effect is stronger in AB and SK than in MB.

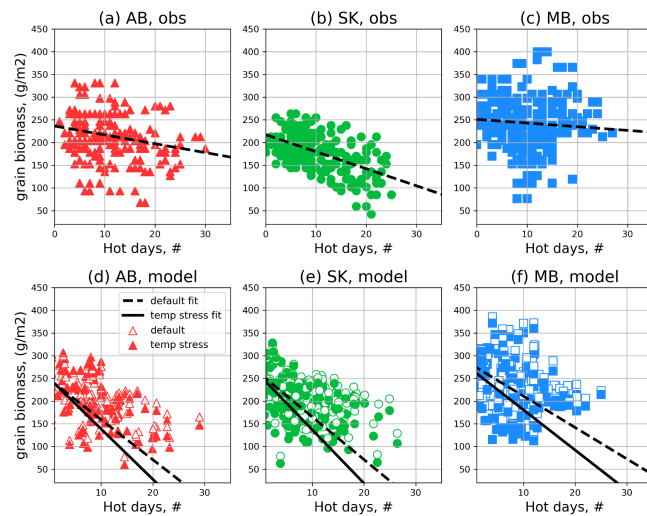

Figure 9 modified, with subplot labels. Scatter plots of numbers of hot days (x-axis) and grain biomass (g/m<sup>2</sup>) from observations (a-c) and model results (d-f). Linear regressions are also shown to better visualize the impacts of heat stress across provinces and two model simulations.

- It is necessary to provide a good scientific explanation of the P90 threshold and the temperature stress function being added.

The P90 temperature threshold for extreme temperature days is reviewed in Zhang et al. (2011: <https://wires.onlinelibrary.wiley.com/doi/abs/10.1002/wcc.147>) and Perkins & Alexander (2013: <https://doi.org/10.1175/JCLI-D-12-00383.1>). This threshold is calculated from the long-term daily maximum temperature with 90th percentile. The daily maximum temperature exceeds which will be counted as a “hot day”. In this way, the total number of hot days can be obtained throughout a growing season.

- In line 326 with the temperature stress simulation, the sentence claims that the stressed yield results correspond to heatwave events in 2002, 2006, and 2012, which mostly agree with the observations. However, it is not evident in Figure 10 that the temperature-stressed simulated yield matches the observations by comparing the overall

trend. For instance, in 2012, the default yield is much closer to the observed yields. Therefore, it is recommended to provide more clarity and detail.

Thank you for this comment. This sentence was trying to highlight the model performance on interannual variability of wheat yields in three provinces, being mostly captured in MB, but not so much in AB or SK. The temperature stress function reduces crop yields compared to the default function, especially for heatwave years, such as 2002, 2006, 2008 and 2011. For 2012, both default and the temperature stress simulation underestimate the crop yields, which suggests there might be other factors missing in the simulation.

- In line 397, “For example, Siebert et al. (2014) claimed that the differences between applying canopy temperature and air temperature in crop models under heat stress simulations.” It is unclear what is being said about the differences between applying canopy temperature and air temperature in crop models under heat stress simulations. Therefore, the sentence needs to be rephrased to provide more clarity.

Thank you for pointing this out. We will rephrase the sentence: For example, Siebert et al. (2014) claimed there is substantial difference between when applying air temperature and canopy temperature in crop model studies during heatwaves - the latter can be 7°C warmer than the former, depending on soil moisture.

- In line 437, it is necessary to mention whether the conclusion is for the region being studied. If the answer is yes, it is recommended to include this information in the sentence.

Thanks for the reminder. Yes, as suggested, we will include that the results obtained from this study are for the Northern Great Plains and Canadian Prairies. In general, as an effort to capture the spatial heterogeneity for the planting dynamics, introducing dynamic planting/harvest in some way would be encouraged to a larger region or global model crop model applications. We will add these descriptions into the manuscript.
